# Supplementary material for: Bioenergetic Phenotyping of DEN-Induced Hepatocellular Carcinoma Reveals a Link Between Adenylate Kinase Isoform Expression and Reduced Complex I-Supported Respiration
Source: PubMed Central journal article supplement (PMC9213884; doi:10.3389/fonc.2022.919880), 2022-06-08
Supplement: DataSheet_1.pdf [file DataSheet_1.pdf]

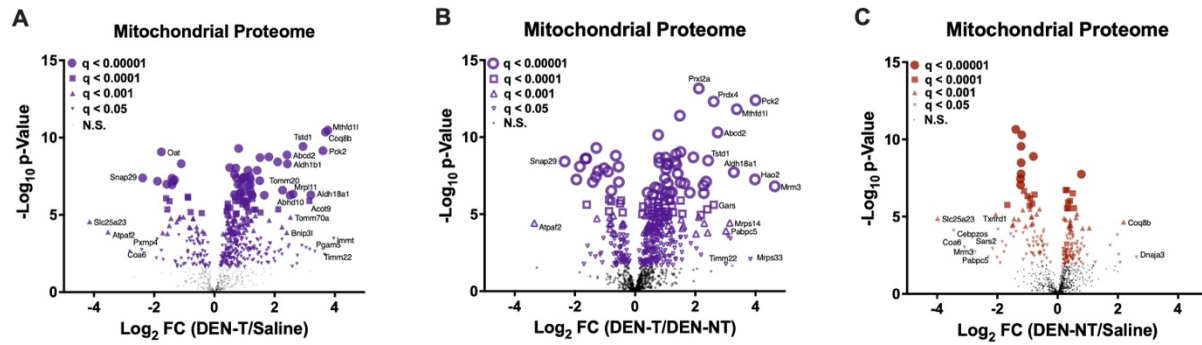

**Supplementary Figure 1. Pairwise mitochondrial proteome volcano plot comparisons between mouse liver and tumor tissues.** (A-C) Volcano plots of differentially expressed mitochondrial proteins identified using the mouse MitoCarta 3.0 database. Plots depict differences between tumor (DEN-T) and saline-treated liver (Saline; **A**), tumor and DEN-treated nontumor liver (DEN-NT; **B**), and DEN-NT and Saline tissues (**C**). Significance is denoted by the size and color of each symbol, as indicated in the legend. Gray symbols indicate adjusted p value > 0.1.

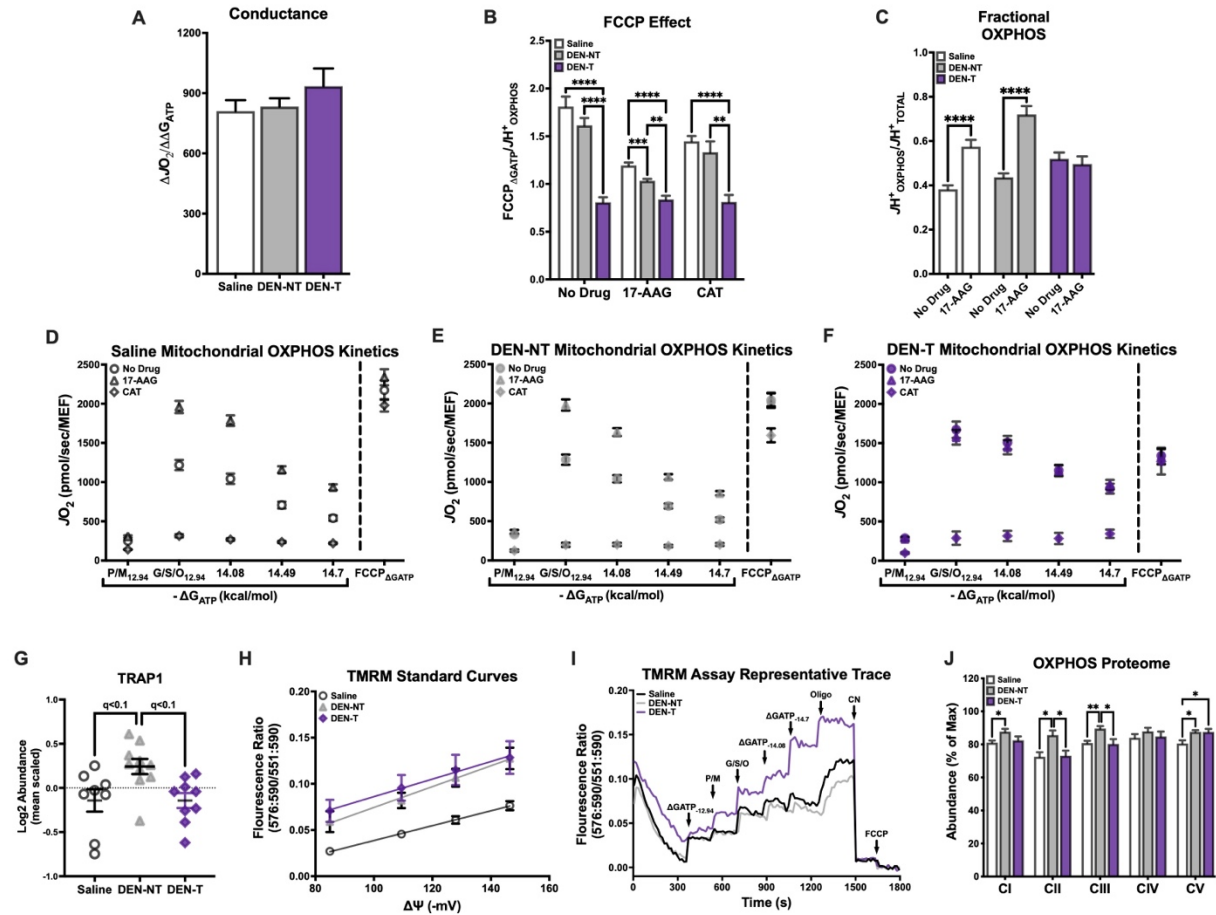

**Supplementary Figure 2. Effects of inhibitors 17AAG and CAT on OXPHOS kinetics. (A)** Comparison of respiratory conductance (dotted lines in **Figure 3E**). **(B)** Comparison of FCCP effect in the presence of no drug, HSP90 inhibitor 17AAG, and adenine dinucleotide transporter inhibitor CAT. **(C)** Comparison of Fractional OXPHOS in the presence and absence of 17AAG. **(D-F)** OXPHOS kinetics protocols in the presence of no drug, 17AAG, or CAT for Saline **(D)**, DEN-NT **(E)**, and DEN-T **(F)**. **(G)** Comparison of relative TRAP1 abundance. **(H)** Plotted TMRM standard curves for Saline, DEN-NT, and DEN-T. **(I)** Representative fluorometric trace of TMRM membrane potential assay. **(J)** Relative abundance of OXPHOS complex protein subunits, presented as % maximal summed abundance per complex. Data are presented as mean  $\pm$  SEM and analyzed by two-way ANOVA **(B-F, J)** and one-way ANOVA **(A)**. \* $p < 0.05$ , \*\* $p < 0.01$ , \*\*\* $p < 0.001$ , \*\*\*\* $p < 0.0001$ .
